# Supplementary material for: Synthesis of 2,6-Diamino-Substituted Purine Derivatives and Evaluation of Cell Cycle Arrest in Breast and Colorectal Cancer Cells
Source: MDPI journal article supplement (doi:10.3390/molecules23081996), 2018-08-10
Supplement: s1 [file s1]

## Supplementary Material

# Synthesis of 2,6-Diamino-substituted Purine Derivatives and Evaluation of Cell Cycle Arrest in Breast and Colorectal Cancer Cells

Bartolomeo Bosco<sup>1</sup>, Andrea Defant<sup>2</sup>, Andrea Messina<sup>1</sup>, Tania Incitti<sup>1</sup>, Denise Sighel<sup>1,2</sup>, Angela Bozza<sup>1</sup>, Yari Ciribilli<sup>1</sup>, Alberto Inga<sup>1</sup>, Simona Casarosa<sup>1,\*</sup> and Ines Mancini<sup>2,\*</sup>

<sup>1</sup> Centre for Integrative Biology (CIBIO), University of Trento, Via Sommarive 9, 38123 Trento, Italy;

<sup>2</sup> Laboratory of Bioorganic Chemistry, Department of Physics, University of Trento, Via Sommarive 14, 38123 Trento, Italy;

\* Correspondence: [ines.mancini@unitn.it](mailto:ines.mancini@unitn.it); Tel.: +39-461-281-548

## Table of Contents

**Table S1.** Data from docking calculation by Autodock Vina of reversine and the HN(7) and HN(9) tautomers of each molecule **1-3** with Aurora-B Kinase and Monopolar Spindle 1.

**Figure S1.** <sup>1</sup>HNMR spectrum (400MHz, CDCl<sub>3</sub>) of reversine analogue **1**, isolated as trifluoroacetate salt.

**Figure S2.** <sup>1</sup>H- and <sup>13</sup>CNMR spectra (CDCl<sub>3</sub>) of compound **2**.

**Figure S3.** <sup>1</sup>H- and <sup>13</sup>CNMR spectra (CDCl<sub>3</sub>) of compound **3**.

**Figure S4.** Western Blot to control the presence or absence of p53 in MCF7 and HCT cell lines. Cells were treated with and without Doxorubicin, an activator of p53.

**Figure S5.** Reversine and the related molecules **1-3** suppressed the growth of human cancer cells. A MCF-7 Vector, B MCF-7shp53, C HCT116p53<sup>+/+</sup> and D HCT116p53<sup>-/-</sup>, were incubated with reversine or its analogues with multiple dosage for 24 hrs. Cell viability was determined by MTT assay. Results are the merge of three experiments.

**Figure S6.** Representative images from analysis of MCF-7 Vector and MCF-7shp53 cell cycle after the treatment with different doses of compounds **1-3**. After the treatment a propidium iodide staining was performed and analyzed by flow cytometry.

**Figure S7.** Representative images from analysis of HCT116 wt and HCT116 p53<sup>-/-</sup> cell cycle after the treatment with different doses of compounds **1-3**. After the treatment a propidium iodide staining was performed and analyzed by flow cytometry.

**Figure S8.** Nuclei and cell membrane staining on MCF-7 Vector and MCF-7shp53 after **1-3** treatments at day 1 and day 4 (Scale bar = 50µm).

**Figure S9.** Superimposed structures of HN(9) tautomers of reversine (green) and molecules **1**(red), **2** (magenta) and **3** (blue) in the complexes with Aurora-B kinase (2VGO), as obtained by docking calculation.

**Figure S10.** Superimposed structures of HN(7) tautomers of molecules **2** (magenta) and **3** (blue) in the complexes with Aurora-B kinase (2VGO), as obtained by docking calculation.

**Table S1.** Data from docking calculation by Autodock Vina of reversine and the HN(7) and HN(9) tautomers of each molecule **1-3** with Aurora-B Kinase and Monopolar Spindle 1.

| <i>Aurora-B kinase</i> (PDB ID: 2VGO) |              |                                       |                                                            | <i>Monopolar spindle 1</i> (PDB ID: 3H9F) |                                        |                                                                                                                                                                                                |
|---------------------------------------|--------------|---------------------------------------|------------------------------------------------------------|-------------------------------------------|----------------------------------------|------------------------------------------------------------------------------------------------------------------------------------------------------------------------------------------------|
| Compound <sup>a</sup>                 | $\Delta E^b$ | H-bond <sup>c,d</sup>                 | Aminoacidic hydrophobic interactions                       | $\Delta E^b$                              | H-bond <sup>c,d</sup>                  | Aminoacidic hydrophobic interactions                                                                                                                                                           |
| <b>Reversine<sup>c</sup></b>          | -35.56       | C(2)-N/L99 (3.15)                     | V107, E171, F172, A173, R175, G176, E177, K180, L223       | -39.75                                    | N(9)/E603 (2.87)<br>C(2)-N/G605 (3.34) | K529, I531, V539, A551, I586, M602, C604, N606, I607, D608, L654, I663, D664, M671, Q672, P673, I531, V539, A551, I586, M602, E603, G605, N606, I607, D608, L654, I663, D664, M671, Q672, P673 |
| <b>1a</b>                             | -35.98       | C(2)-N/L99 (3.16)                     | V107, E171, F172, A173, R175, G176, E177, K180, L223, A233 | -36.40                                    | -                                      | I531, V539, A551, I586, M602, E603, G605, N606, I607, D608, L654, I663, D664, M671, Q672, P673                                                                                                 |
| <b>1b</b>                             | -37.24       | C(2)-N/L99 (3.20)                     | V107, E171, F172, A173, R175, G176, E177, K180, L223, A233 | -38.49                                    | N(9)/E603 (2.87)                       | I531, V539, A551, I586, M602, C604, G605, N606, I607, D608, S611, L654, I663, D664, Q672, P673                                                                                                 |
| <b>2a</b>                             | -32.64       | C(6)-N/E177(3.14)                     | L99, K101, V107, F172, A173, R175, G176, K180, L223        | -35.56                                    | N(9)/D664 (3.13)<br>C(2)-N/D608 (3.12) | K528, I531, V539, A551, I586, E603, N606, I607, L654, I663, M671, Q672, P673                                                                                                                   |
| <b>2b</b>                             | -33.05       | -                                     | L99, V107, F172, A173, G176, E177, K180, L223              | -36.82                                    | C(2)-N/G605 (3.32)                     | I531, V539, A551, I586, M602, E603, C604, N606, I607, D608, L654, I663, D664, M671, Q672, P673                                                                                                 |
| <b>3a</b>                             | -34.31       | C(2)-N/L99 (2.87)                     | V107, F172, A173, G176, E177, K180, L223                   | -33.47                                    | -                                      | I531, G605, N606, I607, D608, S611, D664, P673, D674 T675                                                                                                                                      |
| <b>3b</b>                             | -35.56       | C(2)-N/L99 (2.97)<br>N(9)/A173 (3.15) | V107, F172, G176, E177, K180, L223, A233                   | -35.98                                    | N(9)/E603 (3.08)                       | I531, A551, I586, C604, G605, I607, D608, L654, I663, D664, M671, Q672, P673                                                                                                                   |

<sup>a</sup> **a**=HN(7) tautomer; **b**= HN(9) tautomer

<sup>b</sup> Calculated docking energy in kJ/mol

<sup>c</sup>Position on the molecular structures in according to the numbering reported in Figure1

<sup>d</sup>H-bond distance in Å reported in brackets

<sup>e</sup> HN(9) tautomer according to the crystal structure of reversine-Aurora B kinase complex (D'Alise, A.M. *et al.*, *Mol.Cancer Ther.* **2008**, 7, 1140-1149. doi:10.1158/1535-7163.MCT-07-2051) cited in file 2VGO.pdb.

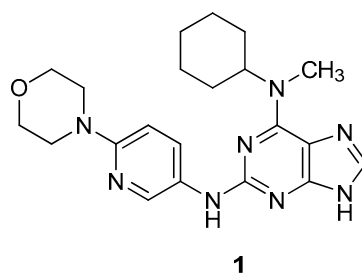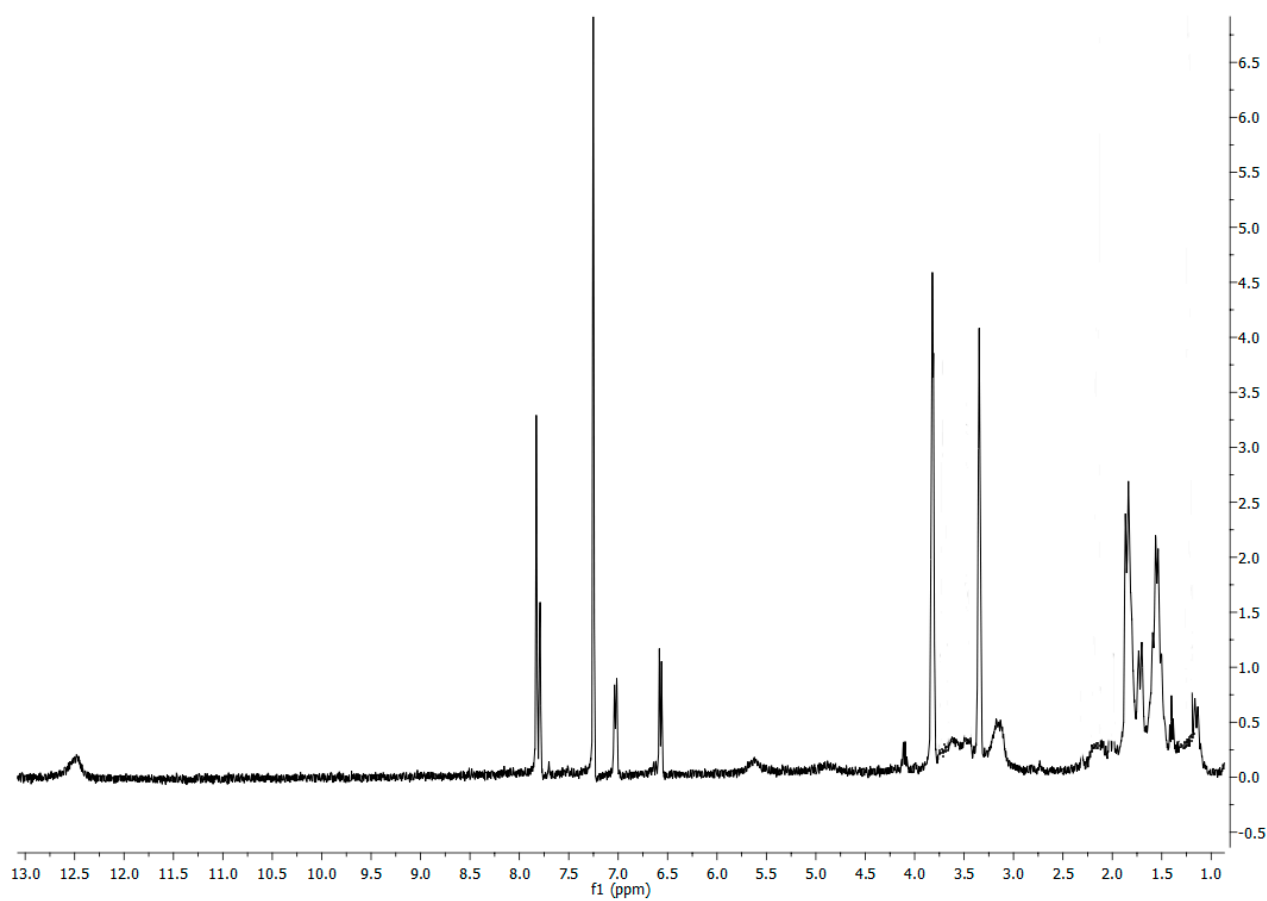

**Fig. S1.** <sup>1</sup>H NMR spectrum (400 MHz, CDCl<sub>3</sub>) of reversine-like molecule **1**, isolated as trifluoroacetate salt.

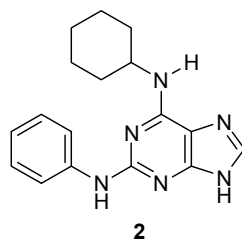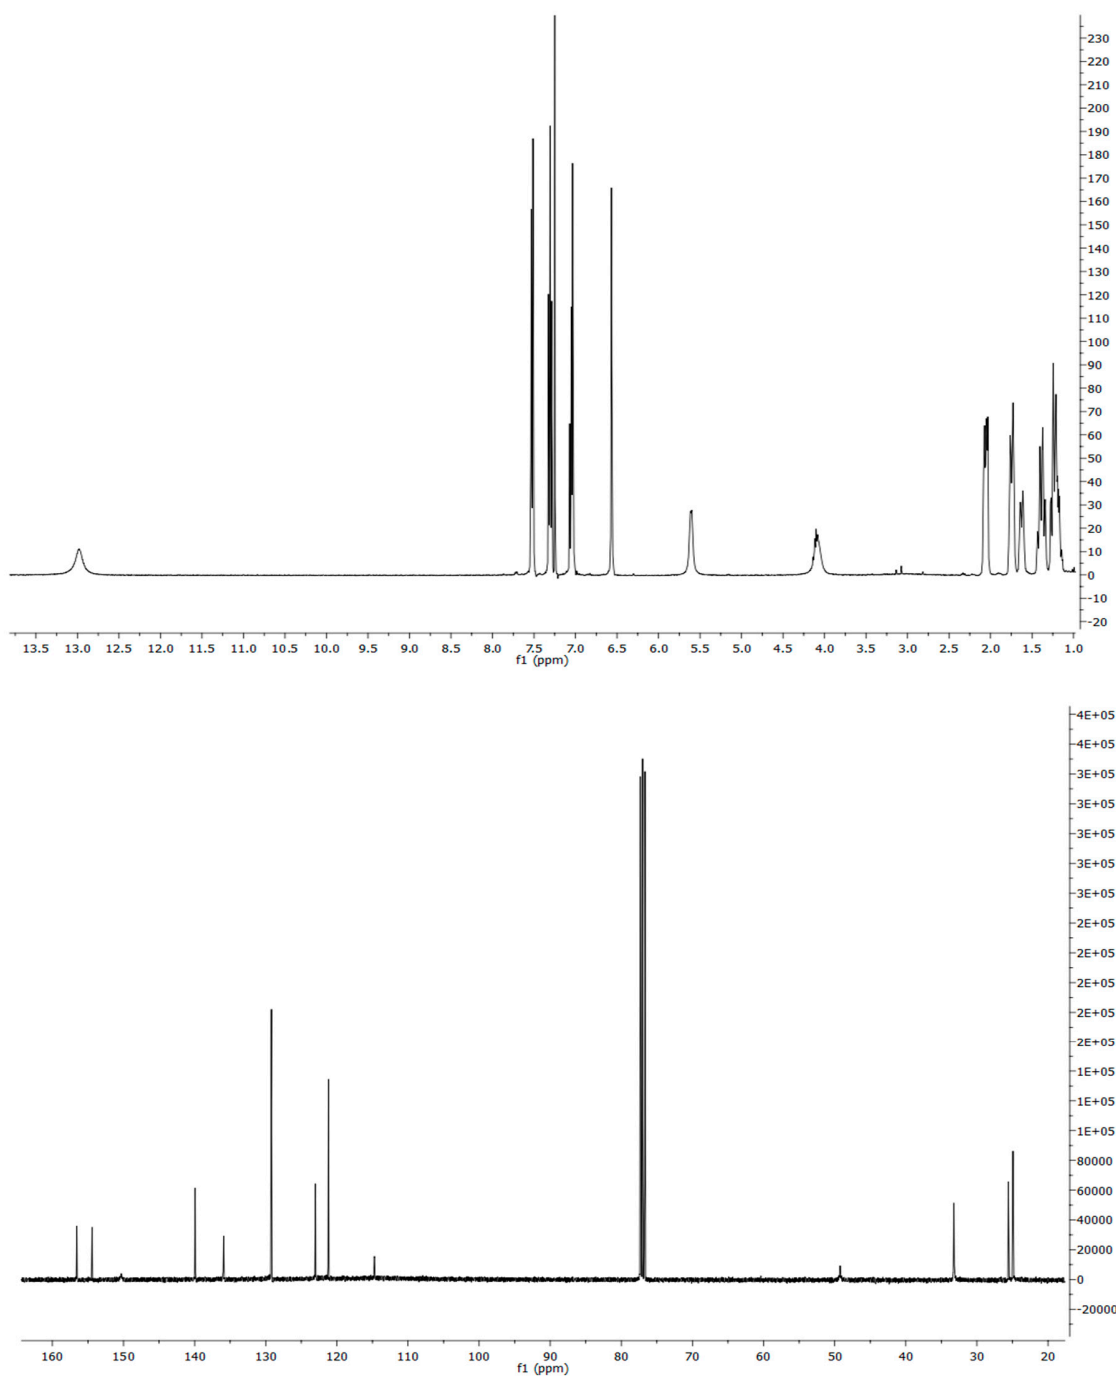

**Fig. S2.**  $^1\text{H}$ - and  $^{13}\text{C}$ NMR spectra ( $\text{CDCl}_3$ ) of compound 2.

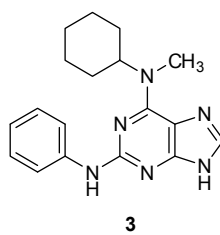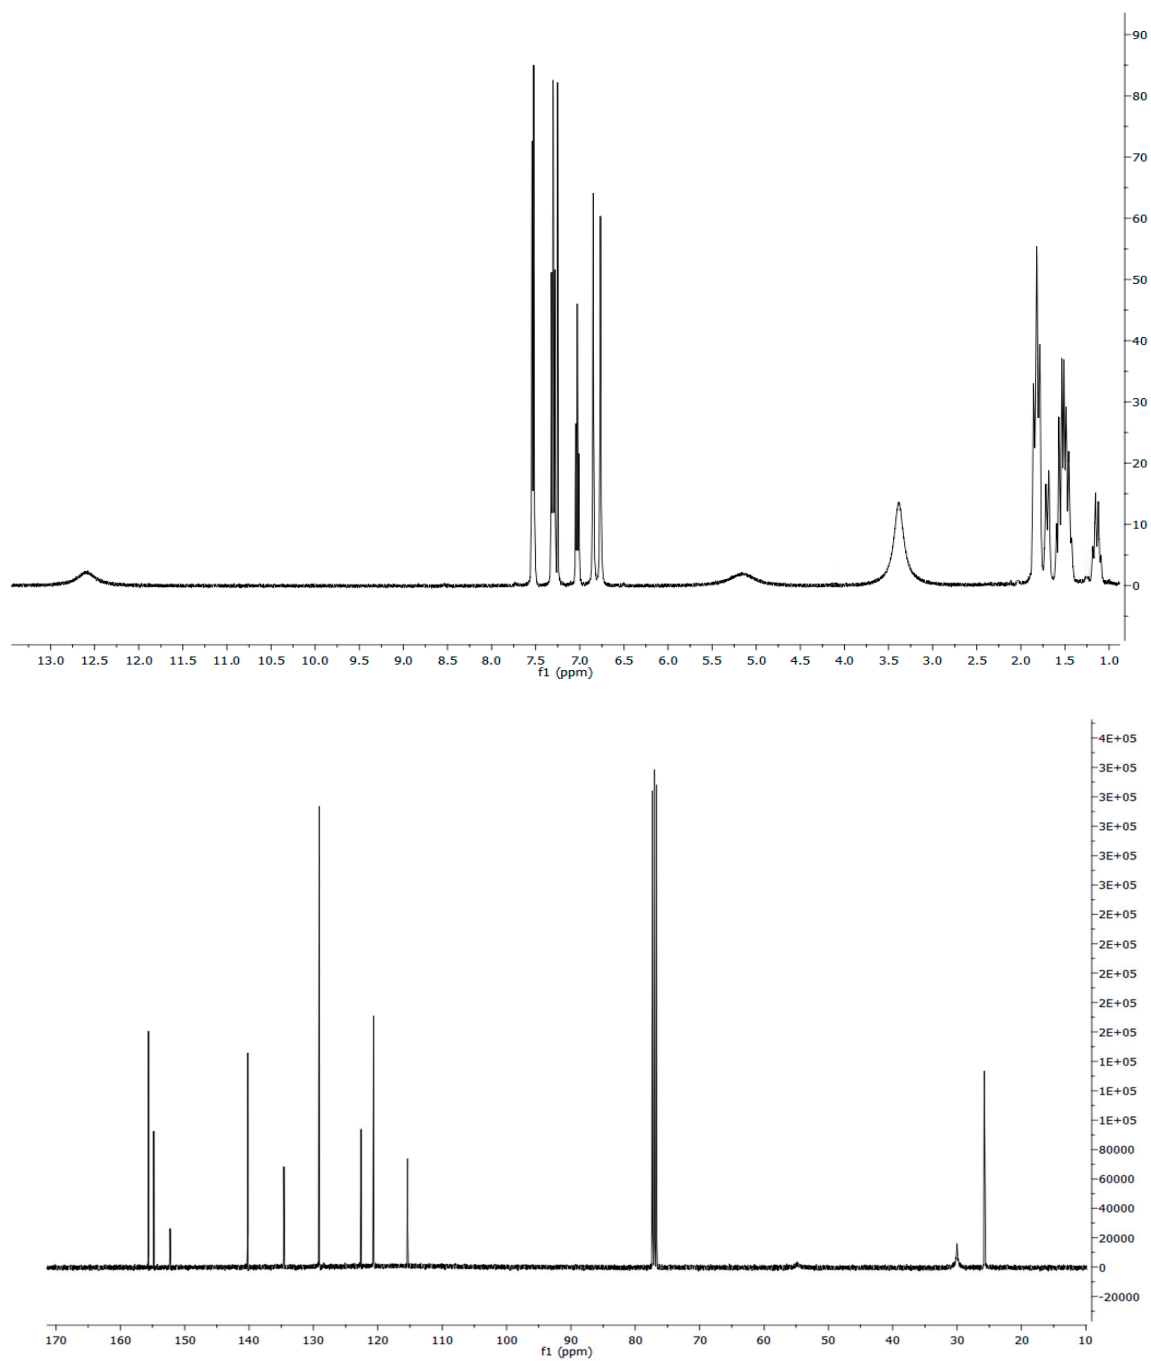

**Fig. S3.** <sup>1</sup>H- and <sup>13</sup>CNMR spectra (CDCl<sub>3</sub>) of compound **3**.

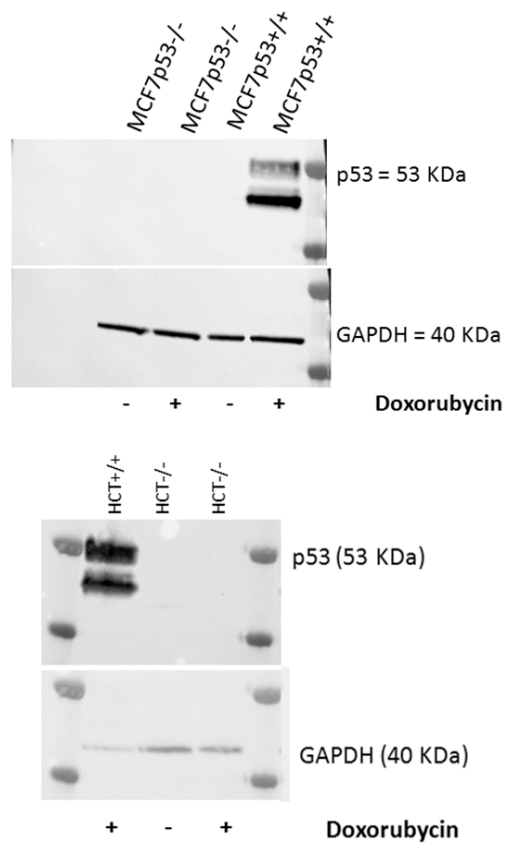

**Fig. S4.** Western Blot to control the presence or absence of p53 in MCF7 and HCT cell lines. Cells were treated with and without Doxorubicin, an activator of p53.

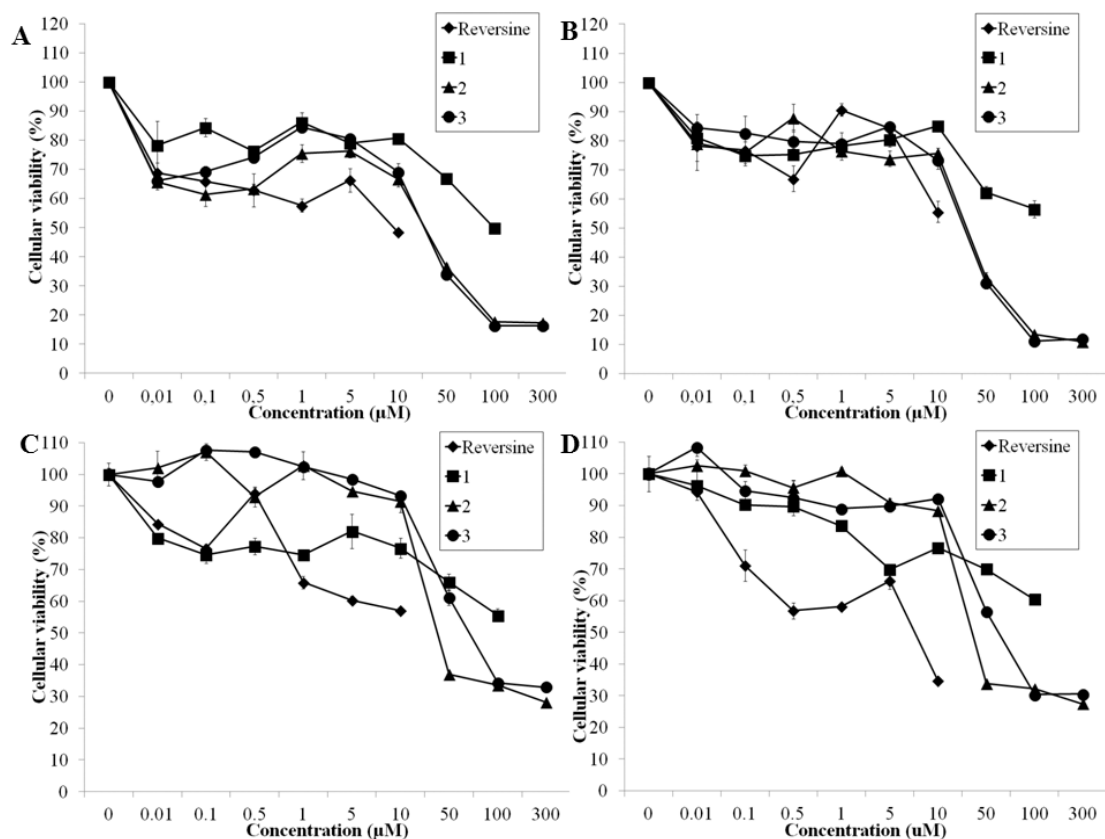

**Fig. S5.** Reversine and the related molecules 1-3 suppressed the growth of human cancer cells. A MCF-7 Vector, B MCF-7shp53, C HCT116p53<sup>+/+</sup> and D HCT116p53<sup>-/-</sup>, were incubated with reversine or its analogues with multiple dosage for 24 hrs. Cell viability was determined by MTT assay. Results are the merge of three experiments.

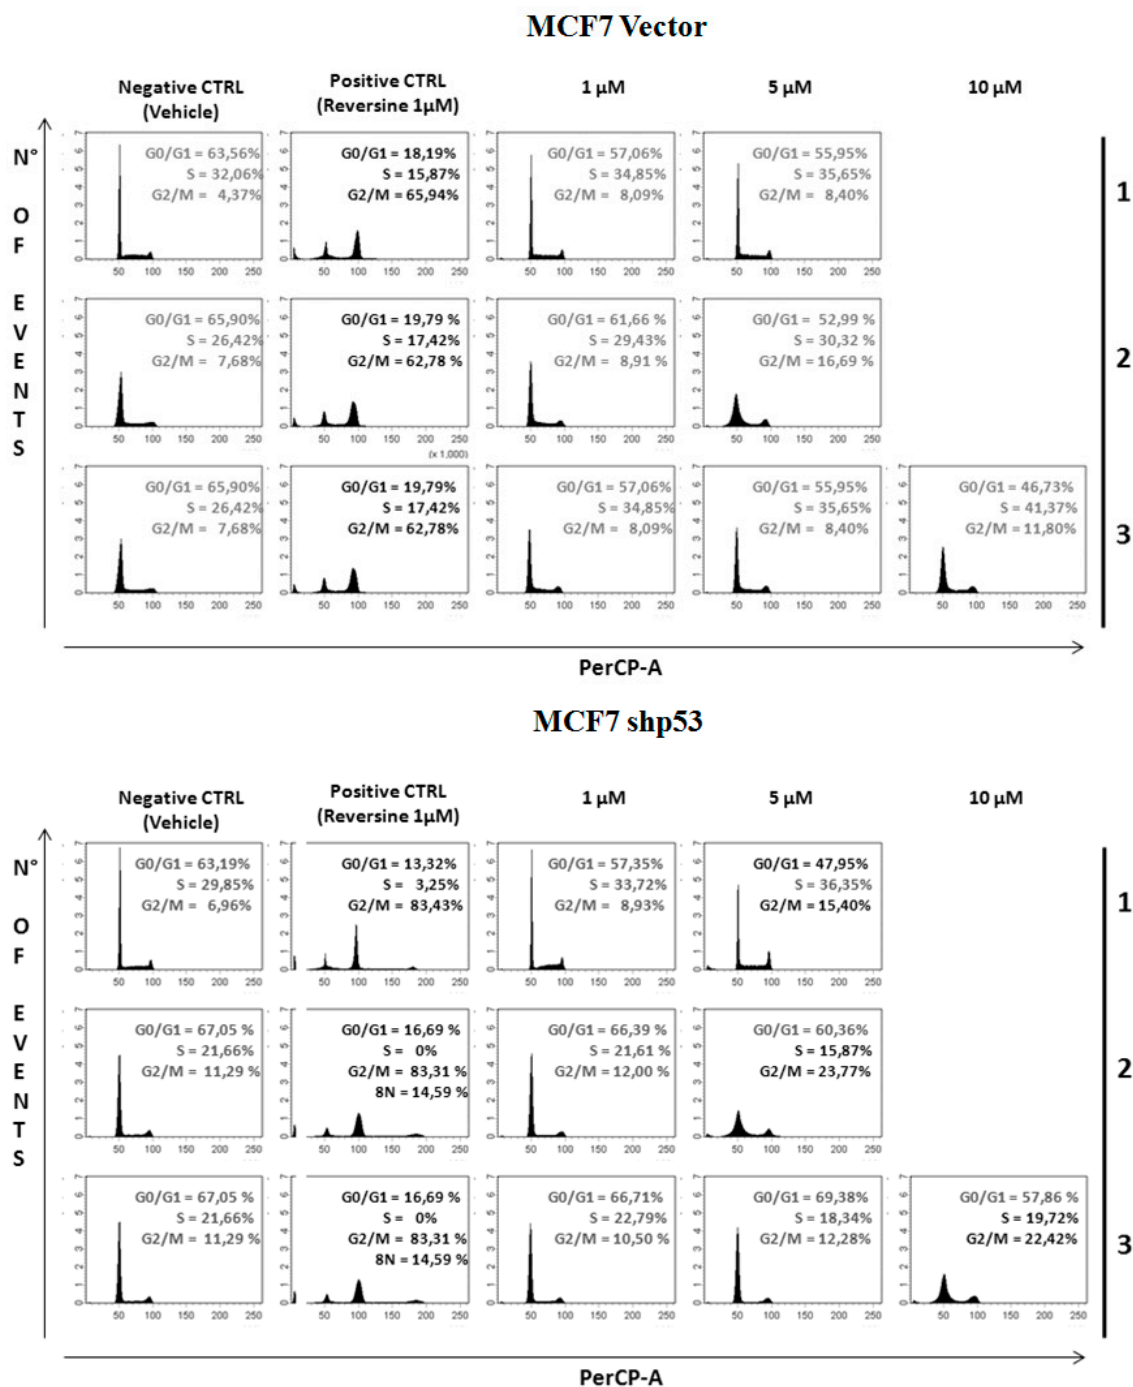

**Figure S6.** Representative images from analysis of MCF-7 Vector and MCF-7shp53 cell cycle after the treatment with different doses of compounds **1-3**. After the treatment a propidium iodide staining was performed and analyzed by flow cytometry.



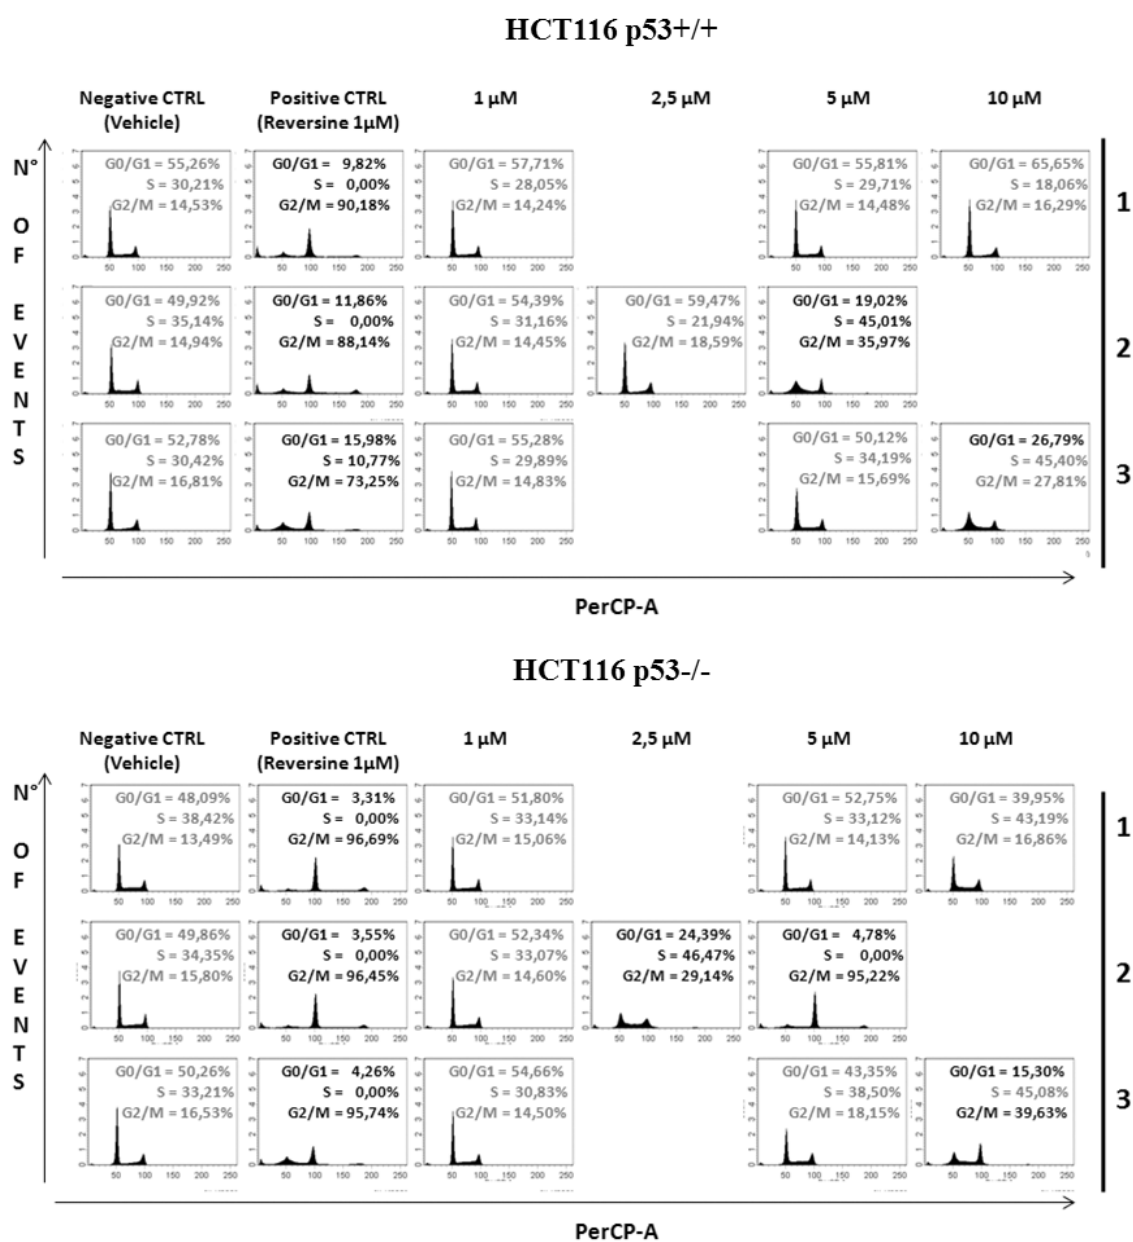

**Figure S7.** Representative images from analysis of HCT116 wt and HCT116 p53<sup>-/-</sup> cell cycle after the treatment with different doses of compounds **1-3**. After the treatment a propidium iodide staining was performed and analyzed by flow cytometry.

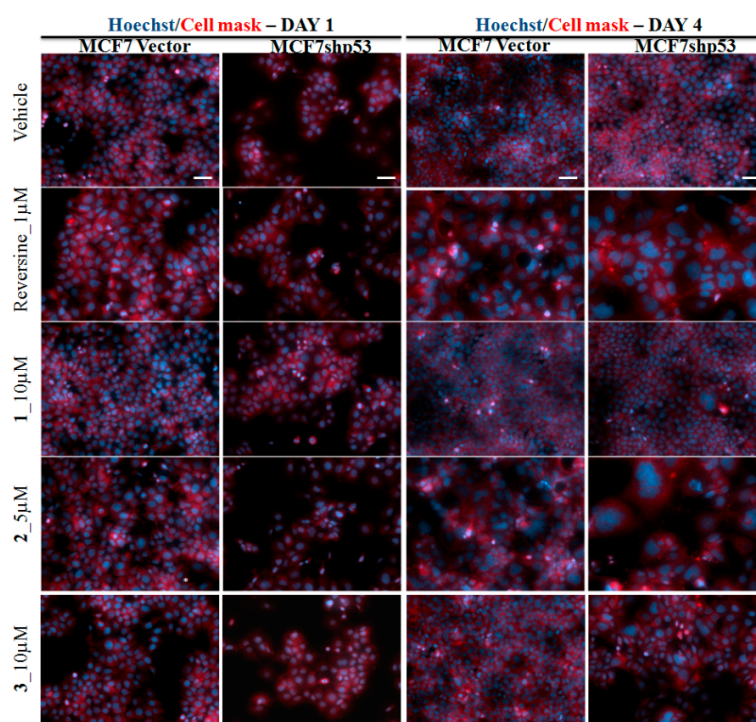

**Figure S8.** Nuclei and cell membrane staining on MCF-7 Vector and MCF-7shp53 after **1-3** treatments at day 1 and day 4 (Scale bar = 50μm).

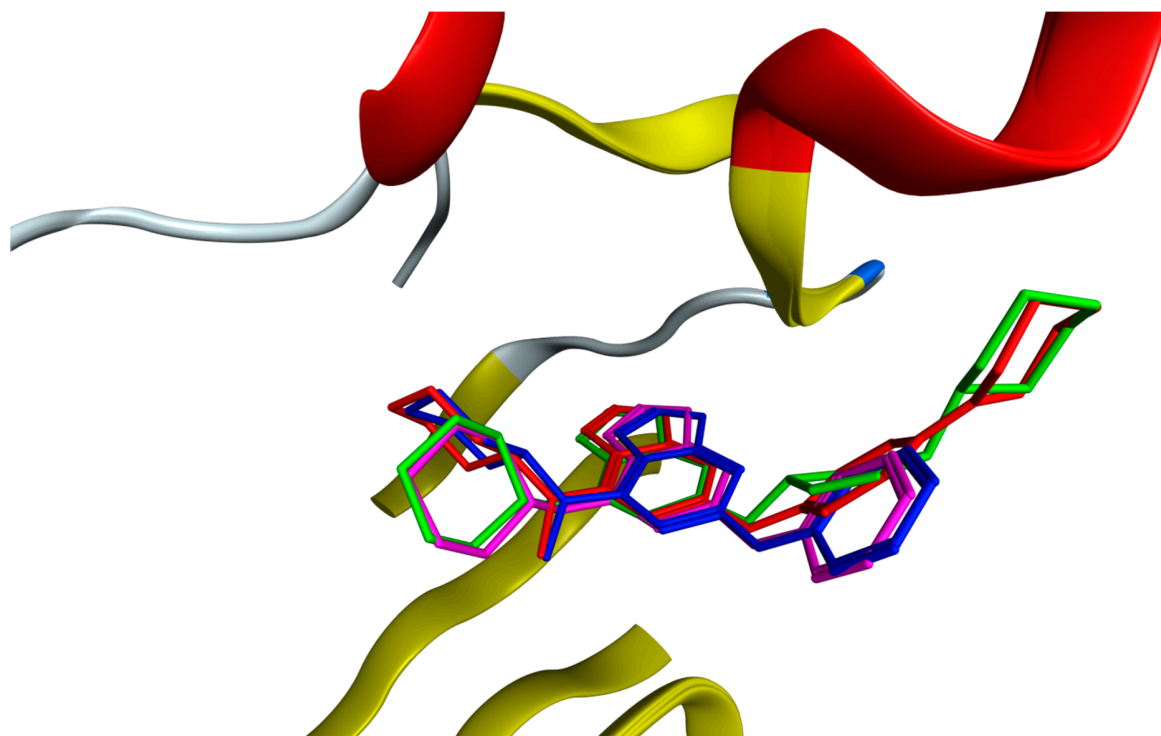

**Figure S9.** Superimposed structures of HN(9) tautomers of reversine (green) and molecules **1**(red), **2** (magenta) and **3** (blue) in the complexes with Aurora-B kinase (2VGO), as obtained by docking calculation.

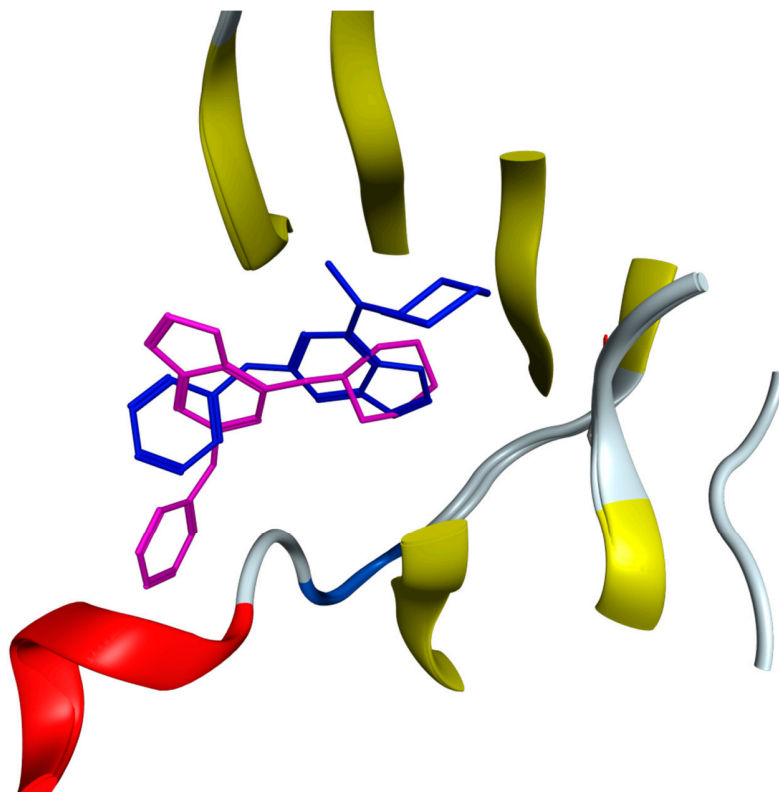

**Figure S10.** Superimposed structures of HN(7) tautomers of molecules **2** (magenta) and **3** (blue) in the complexes with Aurora-B kinase (2VGO), as obtained by docking calculation.
